# Supplementary material for: Structural basis for a class of nanomolar influenza A neuraminidase inhibitors
Source: PubMed Central journal article supplement (PMC3797432; doi:10.1038/srep02871), 2013-10-16

**Structural basis for a class of nanomolar influenza A  
neuraminidase inhibitors**

**(Supplementary Information)**

Philip S. Kerry<sup>1\*</sup>, Sankar Mohan<sup>2</sup>, Rupert J. M. Russell<sup>1</sup>, Nicole Bance<sup>3</sup>, Masahiro  
Niikura<sup>3</sup>, B. Mario Pinto<sup>2\*</sup>

<sup>1</sup>Biomedical Sciences Research Complex, University of St Andrews, St Andrews,  
Fife, KY16 9ST, UK, <sup>2</sup>Department of Chemistry, Simon Fraser University, Burnaby,  
British Columbia, V5A 1S6, Canada and <sup>3</sup>Faculty of Health Sciences, Simon Fraser  
University, Burnaby, British Columbia, V5A 1S6, Canada.

\*email: [psk5@st-and.ac.uk](mailto:psk5@st-and.ac.uk), [bpinto@sfu.ca](mailto:bpinto@sfu.ca)

## Supplementary Figure Legends

**Supplementary Table S1:** Data collection and refinement statistics (molecular replacement)

**Supplementary Figure S1. Comparison of N8:5 and Oseltamivir in complex with an N1 (H274Y mutant).** Superimpositions of N8:5 (dark green, **a** and **b**), *apo*-N8 (2HT5, white, **a** and **b**), N8:1 (2HT8, gold, **b** only) and a complex of Oseltamivir and N1 (H274Y mutant) (3CL0, teal, **a** and **b**).

**Supplementary Figure S2.** Stereo illustrations of novel NA inhibitors within the NA active site. (**a**) N8:4, (**b**) N8:5, (**c**) N8:6, (**d**) N8:7, (**e**) N8:8. 2Fo-Fc electron density around the ligands contoured at  $1\sigma$ .

**Supplementary Figure S3. ED<sub>50</sub> of compound 5 and Oseltamivir carboxylate for wild-type and H274Y A/Brisbane/2007.** Neutral red staining of the monolayers was quantitated at OD<sub>490</sub> after 4 days culture with 50 TCID<sub>50</sub> IFV-A and the test compounds (M). Solid lines indicate the results with the resistant H274Y strain and broken lines with the sensitive wild-type strain. Black lines are for compound 5 and grey lines are for oseltamivir carboxylate. OD<sub>490</sub> level that indicates 50 % protection is also shown.

**Supplementary Table S1**

| Protein                   | N8:4                      | N8:5                      | N8:6                      | N8:7                       | N8:8                      |
|---------------------------|---------------------------|---------------------------|---------------------------|----------------------------|---------------------------|
| PDB accession code        | 4KS1                      | 4KS2                      | 4KS3                      | 4KS4                       | 4KS5                      |
| Space group               | I4                        | I4                        | I4                        | I4                         | I4                        |
| Unit-cell parameters (Å)  | a=90.3, b=90.3,<br>c=94.1 | a=89.7, b=89.7,<br>c=93.7 | a=89.7, b=89.7,<br>c=94.9 | a=90.7, b=90.7,<br>c=108.0 | a=90.3, b=90.3,<br>c=94.7 |
| Maximum resolution (Å)*   | 2.20 (2.24-<br>2.20)      | 2.60 (2.64-<br>2.60)      | 2.60 (2.64-<br>2.60)      | 2.50 (2.54-<br>2.50)       | 2.70 (2.74-<br>2.70)      |
| Unique reflections        | 17922                     | 10242                     | 11650                     | 15146                      | 10514                     |
| Completeness (%) *        | 93.5 (60.4)               | 88.8 (90.1)               | 100.0 (100.0)             | 99.8 (96.9)                | 100.0 (100.0)             |
| Mean I/σI *               | 16.4 (3.0)                | 19.1 (5.0)                | 23.4 (4.2)                | 26.7 (3.5)                 | 19.0 (5.3)                |
| Redundancy                | 4.0                       | 3.8                       | 4.6                       | 7.1                        | 6.7                       |
| R <sub>sym</sub> (%)*     | 0.131 (0.359)             | 0.134 (0.478)             | 0.100 (0.499)             | 0.113 (0.572)              | 0.185 (0.574)             |
| Refinement                |                           |                           |                           |                            |                           |
| Protein atoms             | 3018                      | 3018                      | 3009                      | 3018                       | 3009                      |
| Water atoms               | 281                       | 197                       | 101                       | 116                        | 63                        |
| Ligand atoms              | 20                        | 23                        | 28                        | 28                         | 28                        |
| Other atoms               | 16                        | 1                         | 1                         | 1                          | 1                         |
| Resolution Range (Å)      | 22.07-2.20                | 23.44-2.60                | 32.60-2.6                 | 37.97-2.50                 | 38.03-2.70                |
| R <sub>work</sub> (%)     | 15.3                      | 16.4                      | 13.6                      | 17.9                       | 16.8                      |
| R <sub>free</sub> (%)     | 19.9                      | 19.3                      | 17.6                      | 24.7                       | 19.7                      |
| R.m.s.d. bond lengths (Å) | 0.009                     | 0.024                     | 0.019                     | 0.014                      | 0.017                     |
| R.m.s.d. bond angles (°)  | 1.121                     | 1.960                     | 1.717                     | 1.639                      | 1.416                     |

### Supplementary Figure S1

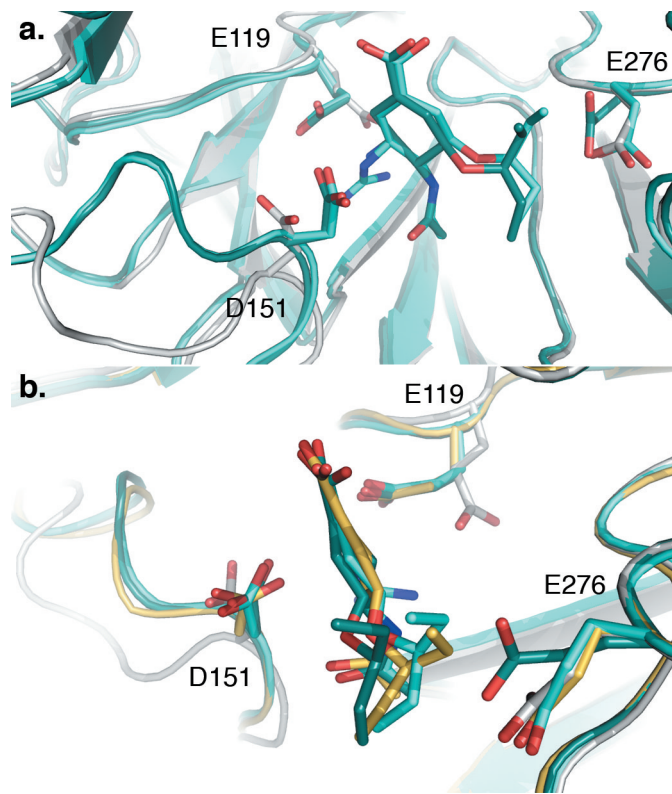

Supplementary Figure S2

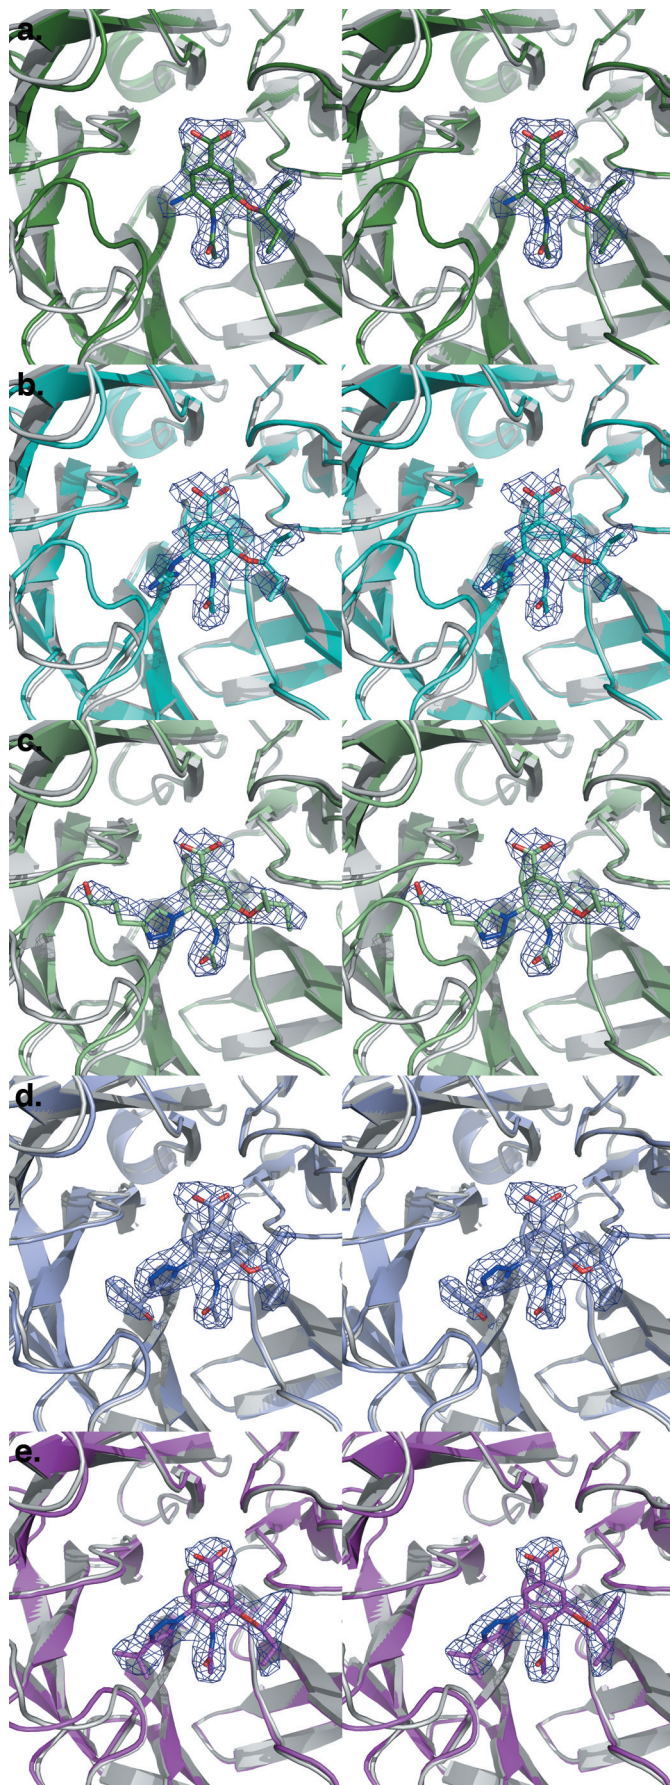

Supplementary Figure S3

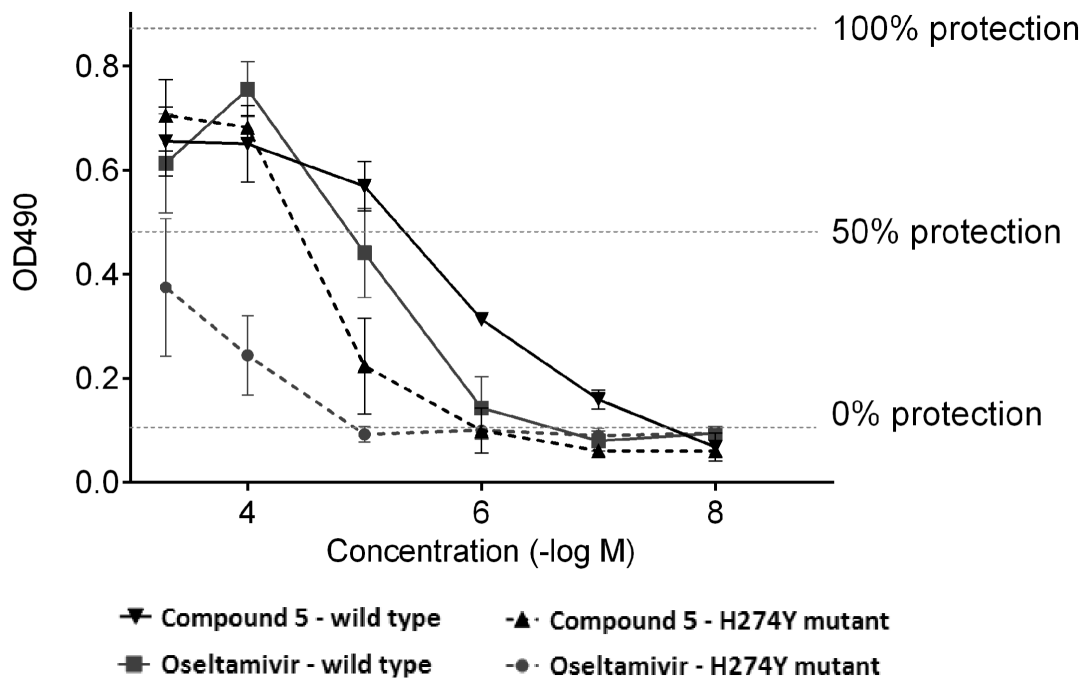

Supplement: srep02871-s1.pdf [file srep02871-s1.pdf]
